# Supplementary material for: Whole-brain circuit dissection in free-moving animals reveals cell-specific mesocorticolimbic networks
Source: JCI journal article supplement (doi:10.1172/jci72117), 2013-11-14

**Figure 1 supplement. CNO does not have off-target effects on FDG uptake in brain or peripheral tissue.**

(A) Peripheral and whole-brain FDG uptake in C57/BL6 mice after vehicle and CNO injections using region of interest analysis. (B) Representative FDG scan used for FDG uptake quantification of A. (C) No significant changes in FDG uptake were observed in response to CNO using Statistical Parametric Mapping analysis.

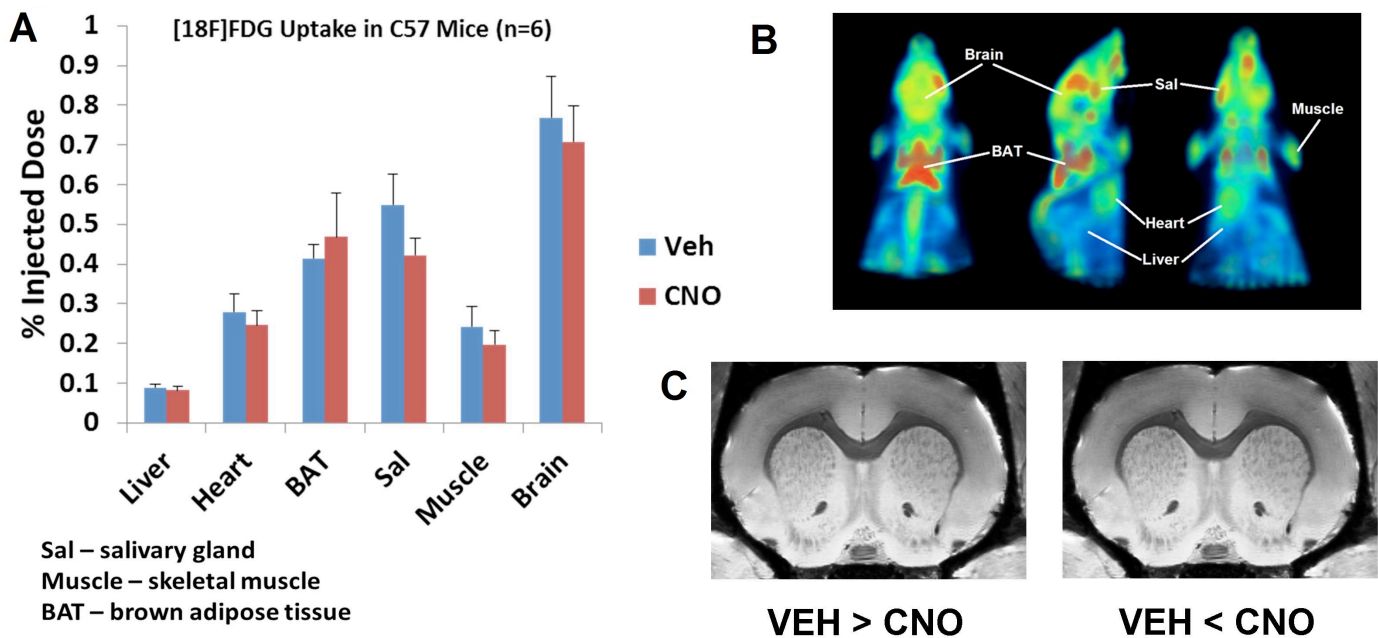

Supplement: sd1 [file 1]
